# Supplementary material for: Molecular characterization of Streptococcus suis isolates recovered from diseased pigs in Europe
Source: Springer Nature journal article supplement (doi:10.1186/s13567-024-01366-y), 2024-09-27

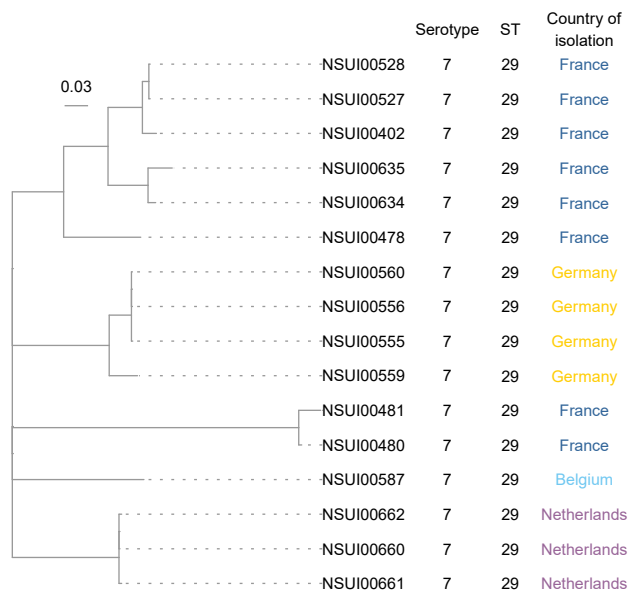

Supplement: MOESM8 [file 13567_2024_1366_MOESM8_ESM.pdf]
